# Supplementary material
Source: PubMed Central journal article supplement (PMC275555)
Supplement: nar_31_22_6570__1.pdf [file nar_31_22_6570__1.pdf]

## Legends for Supplementary Material

Table 1. Classification of the *E.coli* genes in terms of replicating strand, CAI, essentiality and level of expression.

Table 2. Classification of the *B.subtilis* genes in terms of replicating strand, CAI, essentiality and level of expression.
